# Supplementary material for: Enhanced thermoelectric properties of PEDOT:PSS nanofilms by a chemical dedoping process
Source: Royal Society of Chemistry journal article supplement (doi:10.1039/c3ta14960a), 2014-01-01
Supplement: c3ta14960a1.pdf [file c3ta14960a1.pdf]

## Supporting Information

### Enhanced Thermoelectric Properties of PEDOT:PSS Nanofilms by Chemical Dedoping Process

By Hongkwan Park<sup>a</sup>, Seung Hwan Lee<sup>a</sup>, Felix Sunjoo Kim<sup>b</sup>, Hyang Hee Choi<sup>a</sup>, In Woo Cheong<sup>c</sup>, Jung Hyun Kim<sup>a,\*</sup>

<sup>a</sup>Department of Chemical and Biomolecular Engineering, Yonsei University, 50 Yonsei-ro, Seodaemun-gu, Seoul 120–749, Republic of Korea

<sup>b</sup>Department of Chemical Engineering and Materials Science, Chung-Ang University, 84 Heukseok-ro, Dongjak-gu, Seoul 156–756, Republic of Korea

<sup>c</sup>Department of Applied Chemistry, Kyungpook National University, 80 Daehak-ro, Buk-gu, Daegu 702–701, Republic of Korea

#### AFM images of PEDOT:PSS Nanofilms after post-treatment

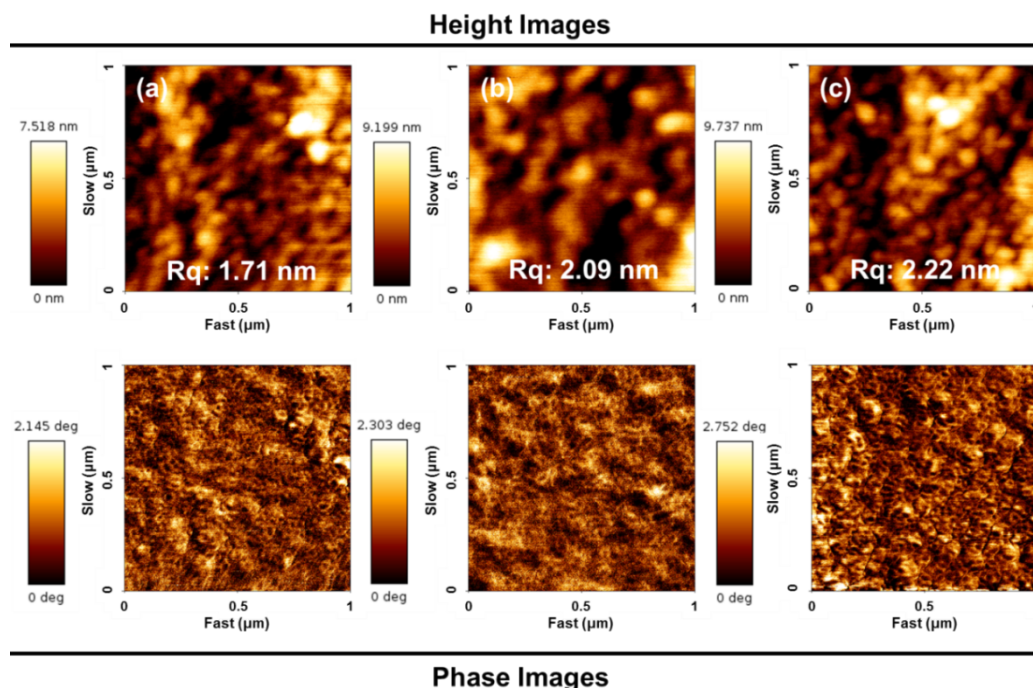

Figure S1. AFM images of PEDOT:PSS nanofilms: (a) pristine, (b) DMSO-treated, and (c) treated with a mixture of DMSO/HZ. All images captured an area of  $1 \times 1 \mu\text{m}^2$ .

Change of carrier concentration and carrier mobility as a result of the dedoping process.

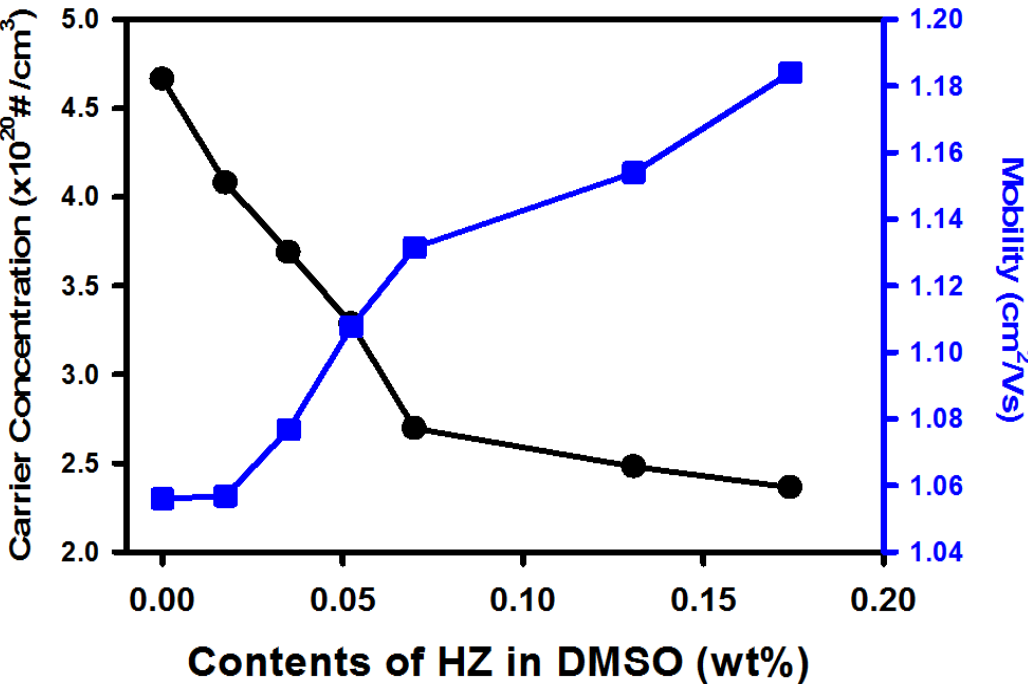

Figure S2. Carrier concentration and carrier mobility of PEDOT:PSS nanofilms after various post-treatment with different ratios of DMSO/HZ mixture solutions. The concentration and mobility were obtained by Hall-effect measurement.
